# Supplementary material for: The GRISLI ice sheet model (version 2.0): calibration and validation for multi-millennial changes of the Antarctic ice sheet
Source: Copernicus journal article supplement (doi:10.5194/gmd-11-5003-2018), 2018-12-07
Supplement: Supplementary file 1 [file gmd-11-5003-2018-supplement.zip]

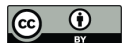

*Supplement of*

## **The GRISLI ice sheet model (version 2.0): calibration and validation for multi-millennial changes of the Antarctic ice sheet**

**Aurélien Quiquet et al.**

*Correspondence to:* Aurélien Quiquet ([aurelien.quiquet@lsce.ipsl.fr](mailto:aurelien.quiquet@lsce.ipsl.fr))

- [gmd-11-5003-2018-supplement-title-page.pdf](#)
- Supplement
  - [Code-sections.tar](#)
  - [Figures.pdf](#)

The copyright of individual parts of the supplement might differ from the CC BY 4.0 License.
